# Supplementary material
Source: PubMed Central journal article supplement (PMC2488191)

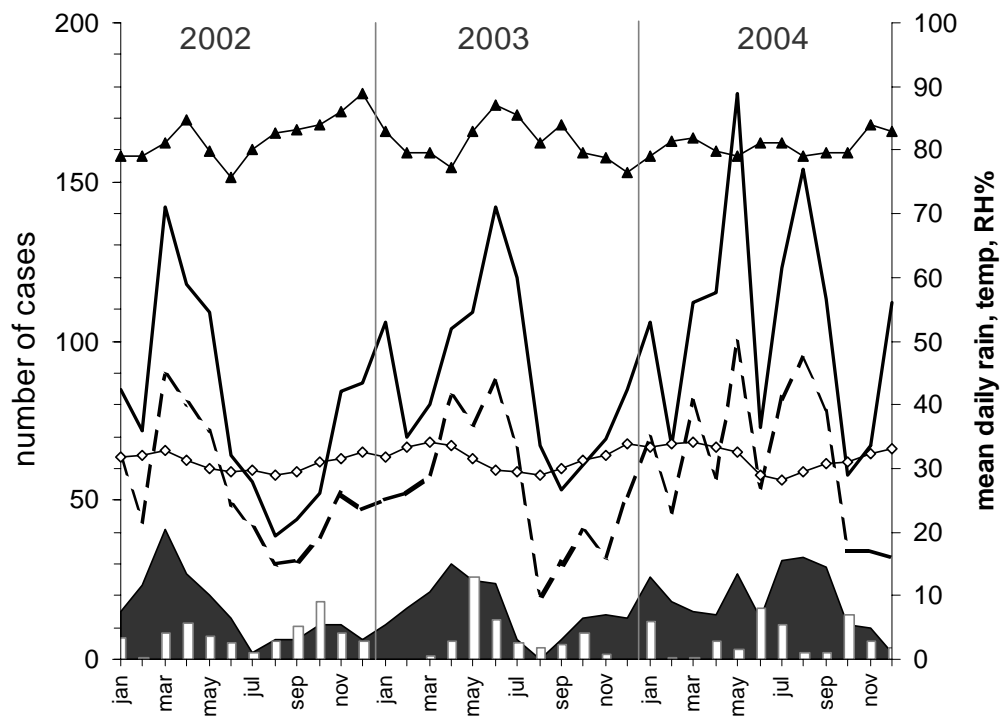

Supplement: pmed.0050153.sg001.pdf [file pmed.0050153.sg001.pdf]
